# Supplementary material for: Interesting dimensional transition through changing cations as the trigger in multinary thioarsenates displaying variable photocurrent response and optical anisotropy
Source: Royal Society of Chemistry journal article supplement (doi:10.1039/d2qi01694j), 2022-01-01
Supplement: d2qi01694j1.pdf [file d2qi01694j1.pdf]

## *Electronic Supplementary Information (ESI)*

---

### **Interesting dimensional transition through changing cations as the trigger in multinary thioarsenates displaying variable photocurrent response and optical anisotropy**

Chao Zhang,<sup>a</sup> Sheng-Hua Zhou,<sup>b,c,d</sup> Yu Xiao,<sup>a</sup> Hua Lin,<sup>\*,b,c,d</sup> and Yi Liu<sup>\*,a</sup>

---

<sup>a</sup>*Institute for Composites Science Innovation (InCSI), School of Materials Science and Engineering, Zhejiang University, Hangzhou 310027, China*

<sup>b</sup>*State Key Laboratory of Structural Chemistry, Fujian Institute of Research on the Structure of Matter, Chinese Academy of Sciences, Fuzhou 350002, China*

<sup>c</sup>*Fujian Science & Technology Innovation Laboratory for Optoelectronic Information of China, Fuzhou 350108, China*

<sup>d</sup>*University of Chinese Academy of Sciences, Beijing 100049, China*

\*E-mail: liuyimse@zju.edu.cn and linhua@fjirsm.ac.cn.

### **Electronic Supplementary Information Index**

#### **1. Experimental Section**

##### 1.1 Physical Measurements

##### 1.2 Syntheses of Cs<sub>2</sub>ZnAs<sub>4</sub>S<sub>8</sub> and [(NH<sub>4</sub>)Cs]CdAs<sub>4</sub>S<sub>8</sub>

##### 1.3 Single-Crystal Structure Characterizations

#### **2. Computational Details**

#### **3. Figures and Tables**

**Figure S1.** The coordination environment of crystallographic unique Cs atoms in (a) Cs<sub>2</sub>ZnAs<sub>4</sub>S<sub>8</sub> and (b) [(NH<sub>4</sub>)Cs]CdAs<sub>4</sub>S<sub>8</sub>.

**Figure S2.** SEM image and energy-dispersive X-ray spectroscopy analysis of Cs<sub>2</sub>ZnAs<sub>4</sub>S<sub>8</sub>.

**Figure S3.** SEM image and energy-dispersive X-ray spectroscopy analysis of

$[(\text{NH}_4)\text{Cs}]\text{CdAs}_4\text{S}_8$ .

**Figure S4.** Experimental (black solid line), calculated (red cross), positions of the Bragg peaks (vertical bars) and difference (blue) results of powder XRD refined by General Structure Analysis System (GSAS) for as-synthesized  $\text{Cs}_2\text{ZnAs}_4\text{S}_8$ .

**Figure S5.** Experimental (black solid line), calculated (red cross), positions of the Bragg peaks (vertical bars) and difference (blue) results of powder XRD refined by General Structure Analysis System (GSAS) for as-synthesized  $[(\text{NH}_4)\text{Cs}]\text{CdAs}_4\text{S}_8$ .

**Figure S6.** TG-DTA diagrams of  $\text{Cs}_2\text{ZnAs}_4\text{S}_8$ .

**Figure S7.** TG-DTA diagrams of  $[(\text{NH}_4)\text{Cs}]\text{CdAs}_4\text{S}_8$ .

**Table S1.** Selected bond lengths (Å) for  $\text{Cs}_2\text{ZnAs}_4\text{S}_8$  and  $[(\text{NH}_4)\text{Cs}]\text{CdAs}_4\text{S}_8$ .

#### 4. References

## 1. Experimental Section

**Physical Measurements.** The elemental analyses have been examined with via an EDX-equipped JEOL/JSM-6360A SEM. Powder X-ray diffraction data were collected on a Bruker D8 Advance diffractometer with a graphite-monochromatized Cu  $K_{\alpha}$  radiation and data were analyzed using a profile fitting by a least-squares method employing the computer program GSAS implemented with EXPGUI.<sup>1</sup> The operating  $2\theta$  angle ranges from  $10^{\circ}$  to  $80^{\circ}$ . Simulation of XRD patterns were carried out by the single-crystal data and diffraction-crystal module of the Mercury (Hg) program version 1.4.2 available free of charge through the website <http://www.iucr.org>. The optical diffuse reflectance spectra were measured on a Hitachi UH4150 UV–vis-NIR spectrometer equipped with an integrating sphere at room temperature. The picked polycrystalline samples were ground into fine powders before measurement. The absorption ( $\alpha/S$ ) data were calculated from reflectance with the Kubelka–Munk function:  $\alpha/S = (1-R)^2/2R$ , in which  $\alpha$  is the absorption coefficient,  $R$  is the reflectance at a specified wavelength, and  $S$  is the scattering coefficient.<sup>2</sup> The photo-electrochemical tests were done under simulated solar light illumination using an electrochemical workstation (CHI660E) with conventional three-electrode setup on open circuit voltage. Each as-prepared powder sample was coated onto a slice of ITO glass with an area of  $0.5 \times 1 \text{ cm}^2$  and employed as the working electrode. A saturated Hg/Hg<sub>2</sub>Cl<sub>2</sub> and a platinum wire were used as the reference and counter electrodes, respectively, and 0.2 M Na<sub>2</sub>SO<sub>4</sub> aqueous solution with 10% lactic acid was used as electrolyte. A 500 W Xe lamp was utilized as the simulated solar light source.

**Syntheses of  $\text{Cs}_2\text{ZnAs}_4\text{S}_8$  and  $[(\text{NH}_4)\text{Cs}]\text{CdAs}_4\text{S}_8$ .** The starting reagents  $\text{CsOH}\cdot\text{H}_2\text{O}$  (99.7%), Zn powder (99.7%), S powder (99.5%) and hydrazine monohydrate (85%) purchased from Sinopharm Chemical Reagent Co., Ltd. were used as obtained. Oleic acid (85%) and the binary starting material  $\text{As}_2\text{S}_3$  (99.9%) was purchased from Aladdin Co., Ltd. All the chemicals used for synthesis are of analytical grade and directly used without further purification.

Compound  $\text{Cs}_2\text{ZnAs}_4\text{S}_8$  was obtained by the reaction as follows: 1.5 mmol of  $\text{CsOH}\cdot\text{H}_2\text{O}$ , 0.4 mmol of Zn, 0.5 mmol of  $\text{As}_2\text{S}_3$ , 2.5 mmol of S, 2.0 mL of oleic acid and 0.5 mL of hydrazine monohydrate. All reactants were sealed in a 25 mL Teflon-lined stainless autoclave which was kept at 413 K for 7 days prior to cooling to room temperature naturally. The resultant reaction mixtures were washed with distilled water and ethanol, respectively. A lot of yellow block-shaped  $\text{Cs}_2\text{ZnAs}_4\text{S}_8$  crystals (approximately 90% yield based on Zn) were obtained and pure phase could be easily obtained by manually picking crystals from the mixtures.

Compound  $[(\text{NH}_4)\text{Cs}]\text{CdAs}_4\text{S}_8$  was synthesized with similar procedures. A lot of orange block-shaped  $[(\text{NH}_4)\text{Cs}]\text{CdAs}_4\text{S}_8$  crystals (approximately 80% yield based on Cd) were obtained. Both  $\text{Cs}_2\text{ZnAs}_4\text{S}_8$  and  $[(\text{NH}_4)\text{Cs}]\text{CdAs}_4\text{S}_8$  are stable in air for several months. Their phase purities have been confirmed by the powder XRD patterns matching well with the simulated ones.

**Single-Crystal Structure Characterizations.** Suitable single crystals of the title compounds were mounted on the glass fibers. Diffraction data were collected by an Oxford Xcalibur (Atlas Gemini ultra) diffractometer with a graphite-monochromated

Mo-K $\alpha$  radiation ( $\lambda = 0.71073$  Å) at room temperature. The absorption corrections were based on the multi-scan method. The structures were solved by the direct methods and refined by the full-matrix least-squares fitting on  $F^2$  using the *SHELXL-2014* software package.<sup>3</sup> The assignments of atoms were determined on the basis of the interatomic distances, coordination environments and relative displacement parameters. The structure was verified using the *ADDSYM* algorithm from the program *PLATON*.<sup>4</sup> The final atomic positions were standardized with the *STRUCTURE TIDY* program.<sup>5</sup> Crystal data and refinement details are summarized in Tables 1-2, the selected bond lengths are listed in Table S1. CCDC number: 2167064–2167065.

**Computational Details.** Crystallographic data determined by single crystal X-ray diffraction were used for theoretical calculations of their electronic band structures. The density functional theory (DFT) calculations have been performed using the Vienna ab initio simulation package (VASP)<sup>6-8</sup> with the Perdew-Burke-Ernzerhof (PBE)<sup>9</sup> exchange correlation functional. The projected augmented wave (PAW)<sup>10</sup> potentials have been used to treat the ion-electron interactions. A  $\Gamma$ -centered  $5 \times 5 \times 7$  Monkhorst-Pack grid for the Brillouin zone sampling and a cutoff energy of 700 eV for the plane wave expansion were found to get convergent lattice parameters and self-consistent energies.

Figures and Tables

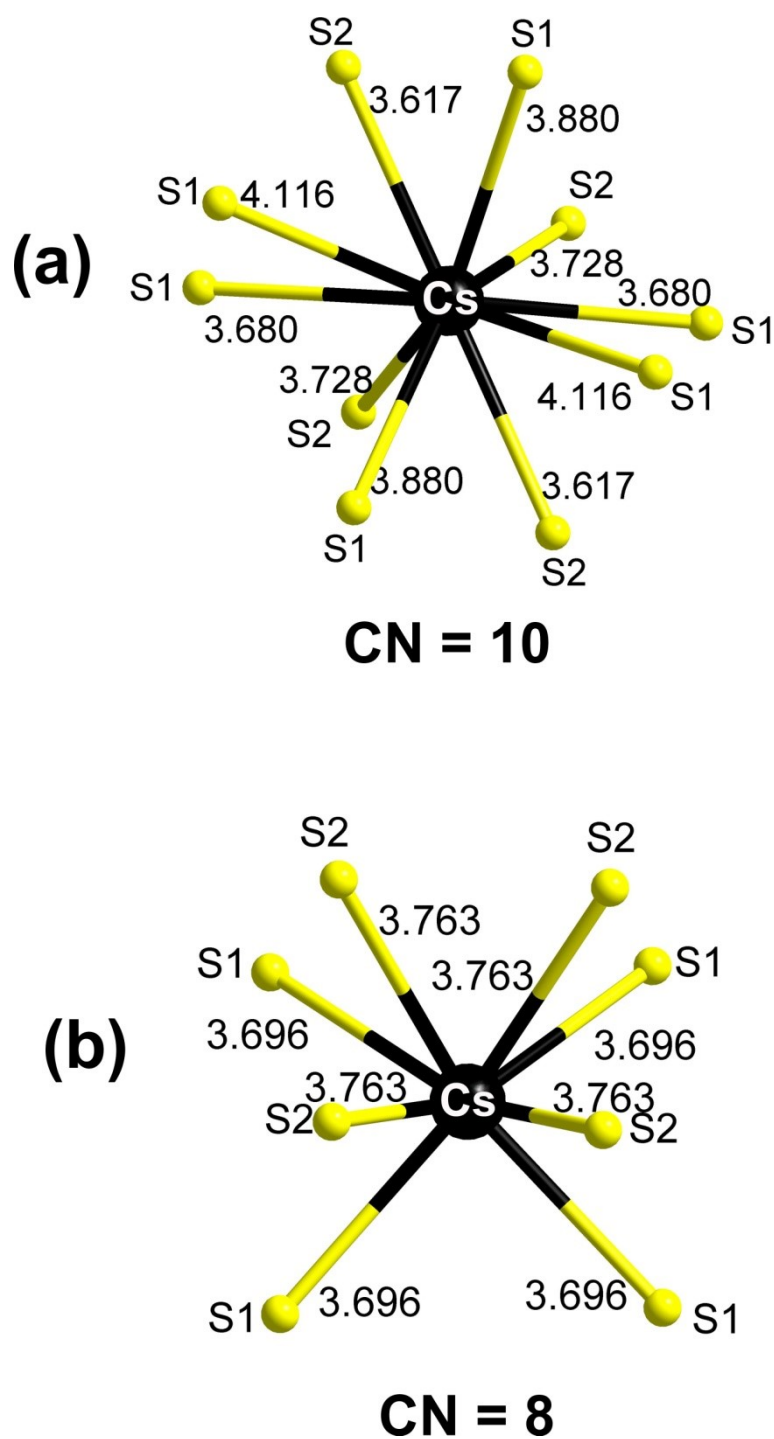

**Figure S1.** The coordination environment of crystallographic unique Cs atoms in (a)  $\text{Cs}_2\text{ZnAs}_4\text{S}_8$  and (b)  $[(\text{NH}_4)\text{Cs}]\text{CdAs}_4\text{S}_8$ .

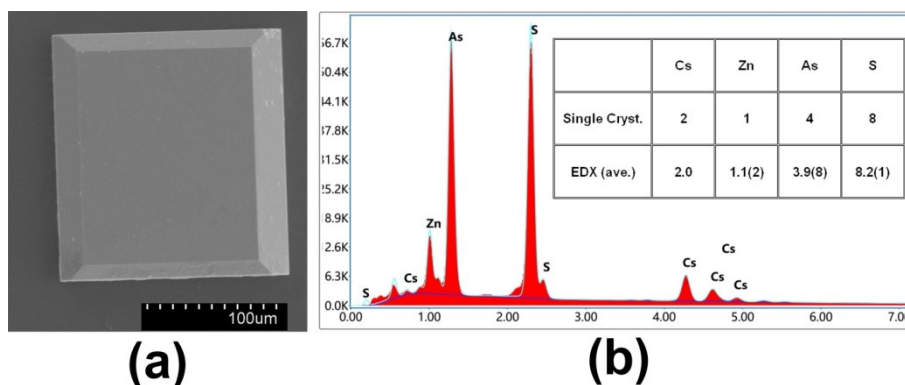

**Figure S2.** SEM image and energy-dispersive X-ray spectroscopy analysis of  $\text{Cs}_2\text{ZnAs}_4\text{S}_8$ .

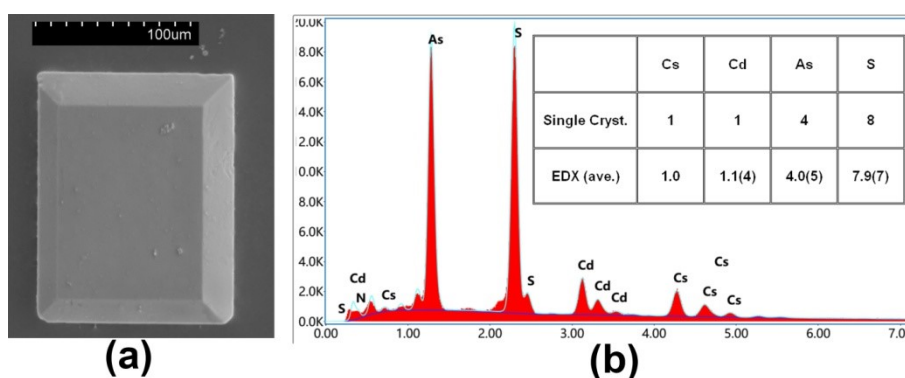

**Figure S3.** SEM image and energy-dispersive X-ray spectroscopy analysis of  $[(\text{NH}_4)\text{Cs}]\text{CdAs}_4\text{S}_8$ .

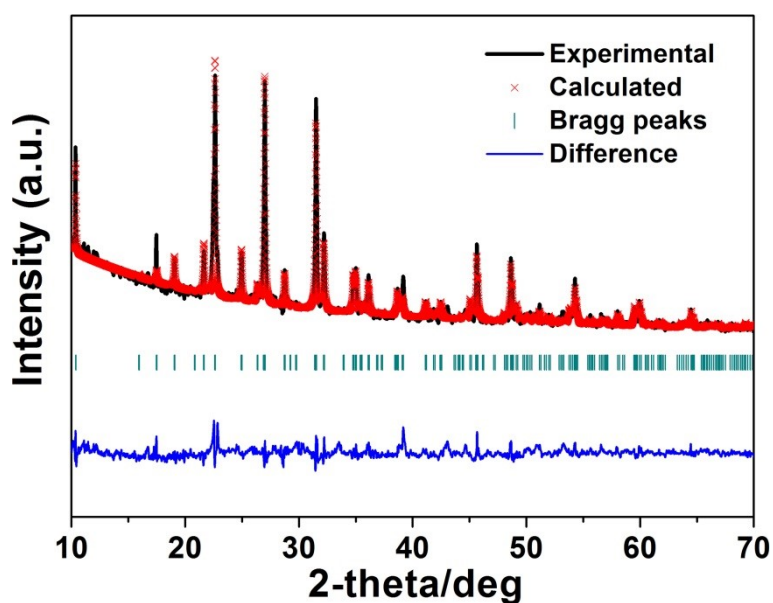

**Figure S4.** Experimental (black solid line), calculated (red cross), positions of the Bragg peaks (vertical bars) and difference (blue) results of powder XRD refined by General Structure Analysis System (GSAS) for as-synthesized  $\text{Cs}_2\text{ZnAs}_4\text{S}_8$ .

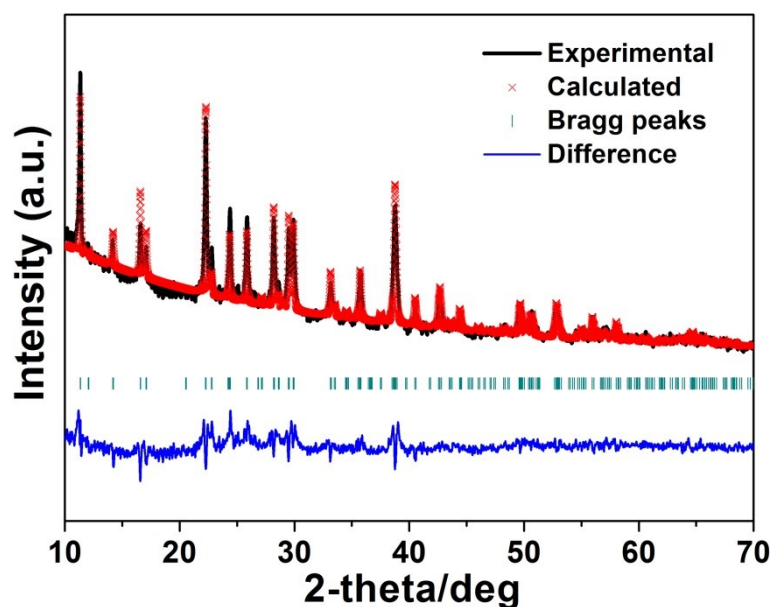

**Figure S5.** Experimental (black solid line), calculated (red cross), positions of the Bragg peaks (vertical bars) and difference (blue) results of powder XRD refined by General Structure Analysis System (GSAS) for as-synthesized  $[(\text{NH}_4)\text{Cs}]\text{CdAs}_4\text{S}_8$ .

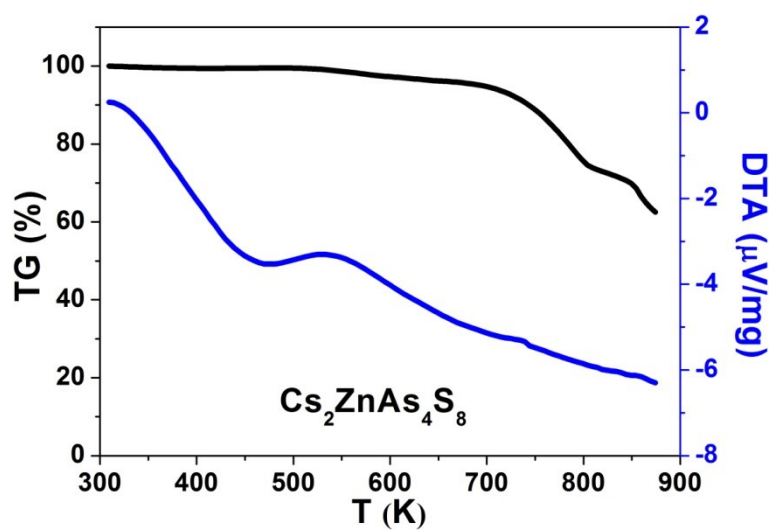

Figure S6. TG-DTA diagrams of  $\text{Cs}_2\text{ZnAs}_4\text{S}_8$ .

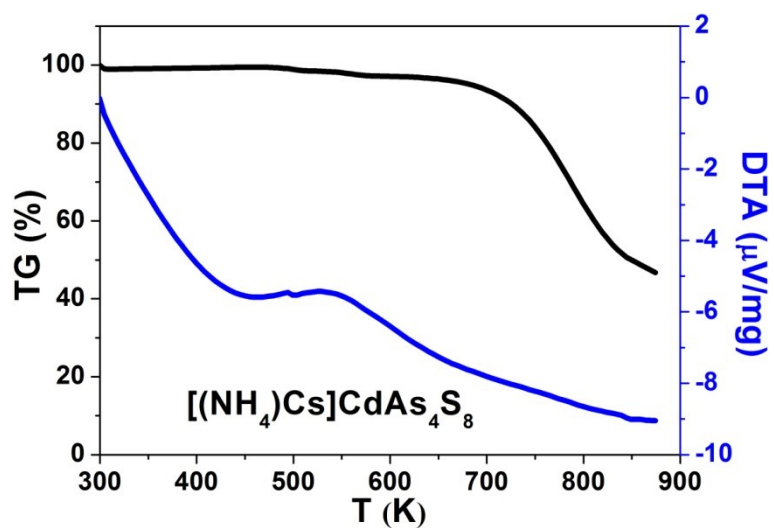

Figure S7. TG-DTA diagrams of  $[(\text{NH}_4)\text{Cs}]\text{CdAs}_4\text{S}_8$ .

**Table S1.** Selected bond lengths (Å) for Cs<sub>2</sub>ZnAs<sub>4</sub>S<sub>8</sub> and [(NH<sub>4</sub>)Cs]CdAs<sub>4</sub>S<sub>8</sub>.

| Cs <sub>2</sub> ZnAs <sub>4</sub> S <sub>8</sub> |             | [(NH <sub>4</sub> )Cs]CdAs <sub>4</sub> S <sub>8</sub> |             |
|--------------------------------------------------|-------------|--------------------------------------------------------|-------------|
| As–S2                                            | 2.2143(5)   | As–S1                                                  | 2.2086(5)   |
| As–S1                                            | 2.2738(5)   | As–S2                                                  | 2.2676(5)   |
| As–S1                                            | 2.3267(5)   | As–S2                                                  | 2.3008(5)   |
| Zn–S2 ×4                                         | 2.3309(5)   | Cd–S1 ×4                                               | 2.5481(5)   |
| Cs–S2                                            | 3.6170(5)   | Cs–S1 ×4                                               | 3.6957(5)   |
| Cs–S1                                            | 3.6810(6)   | Cs–S2 ×4                                               | 3.7634(5)   |
| Cs–S2                                            | 3.7277(5)   |                                                        |             |
| Cs–S1                                            | 3.8795(5)   |                                                        |             |
| Cs–S1                                            | 4.1160(6)   |                                                        |             |
| ∠S2–As–S1                                        | 94.17(2)    | ∠S1–As–S2                                              | 99.315(18)  |
| ∠S2–As–S1                                        | 103.280(19) | ∠S1–As–S2                                              | 99.650(18)  |
| ∠S1–As–S1                                        | 98.074(13)  | ∠S1–As–S2                                              | 101.38(2)   |
| ∠S2–Zn–S2 ×4                                     | 105.787(11) | ∠S1–Cd–S1 ×4                                           | 106.820(10) |
| ∠S2–Zn–S2 ×2                                     | 117.12(2)   | ∠S1–Cd–S1 ×2                                           | 114.91(2)   |

#### 4. References

- (1) B. H. Toby, *EXPGUI, a graphical user interface for GSAS. J. Appl. Crystallogr.*, 2001, **34**, 210.
- (2) G. Kortüm, *Reflectance Spectroscopy*; Springer-Verlag: NewYork, 1969.
- (3) Sheldrick, G. M. A short history of SHELX, *Acta Crystallogr., Sect. A: Found. Crystallogr.*, 2008, 112–122.
- (4) A. L. Spek, Single-crystal structure validation with the program PLATON, *J. Appl. Cryst.*, 2003, **36**, 7–13.
- (4) L. M. Gelato and E. J. Parthe, STRUCTURE TIDY—a computer program to standardize crystal structure data, *Appl. Crystallogr.*, 1987, **20**, 139–143.
- (5) M. D. Segall, P. J. D. Lindan, M. J. Probert, C. J. Pickard, P. J. Hasnip, S. J. Clark and M. C. Payne, First-principles simulation: ideas, illustrations and the CASTEP code, *J. Phys.: Condens. Matter*, 2002, **14**, 2717–2744.
- (6) G. Kresse, VASP, 5.3.5; <http://cms.mpi.univie.ac.at/vasp/vasp/vasp.html>.
- (7) G. Kresse and J. Furthmüller, Efficient iterative schemes for ab initio total-energy calculations using a plane-wave basis set, *Phys. Rev. B: Condens. Matter*, 1996, **54**, 11169–11186.
- (8) G. Kresse and D. Joubert, From ultrasoft pseudopotentials to the projector augmented-wave method, *Phys. Rev. B: Condens. Matter*, 1999, **59**, 1758–1775.
- (9) J. P. Perdew, K. Burke and M. Ernzerhof, Generalized gradient approximation made simple, *Phys. Rev. Lett.*, 1996, **77**, 3865–3868.
- (10) P. E. Blochl, Projector augmented-wave method, *Phys. Rev. B: Condens. Matter*,

1994, **50**, 17953–17979.
